# Supplementary material for: A novel method for quantifying the rate of embryogenesis uncovers considerable genetic variation for the duration of embryonic development in Drosophila melanogaster
Source: PubMed Central journal article supplement (PMC5054588; doi:10.1186/s12862-016-0776-z), 2016-10-07
Supplement: 12862_2016_776_MOESM1_ESM.pdf [file 12862_2016_776_MOESM1_ESM.pdf]

**Table S1.** Assay of measuring the length of embryogenesis – imaging time points and corresponding embryonic development times. Images were taken hourly from 10 am until 1 pm, then in every half an hour throughout the hatching peak, and again hourly from 6 to 8 pm. The last time point of the image stack is 10 am the following morning: embryos which hatch between 8 pm and 10 am are later added to the last development time group (25.5 h), despite their embryogenesis lasted longer than this.

|                                          |          |          |          |         |         |         |         |         |         |         |         |         |         |         |         |         |          |
|------------------------------------------|----------|----------|----------|---------|---------|---------|---------|---------|---------|---------|---------|---------|---------|---------|---------|---------|----------|
| Imaging time point                       | 10:00 AM | 11:00 AM | 12:00 PM | 1:00 PM | 1:30 PM | 2:00 PM | 2:30 PM | 3:00 PM | 3:30 PM | 4:00 PM | 4:30 PM | 5:00 PM | 5:30 PM | 6:00 PM | 7:00 PM | 8:00 PM | 10:00 AM |
| Image number                             | _1       | _2       | _3       | _4      | _5      | _6      | _7      | _8      | _9      | _10     | _11     | _12     | _13     | _14     | _15     | _16     | _17      |
| Corresponding embryonic development time | <15.5 h  | 16.5 h   | 17.5 h   | 18.5 h  | 19 h    | 19.5 h  | 20 h    | 20.5 h  | 21 h    | 21.5 h  | 22 h    | 22.5 h  | 23 h    | 23.5 h  | 24.5 h  | 25.5 h  | > 25.5 h |
