# Supplementary material for: A novel method for quantifying the rate of embryogenesis uncovers considerable genetic variation for the duration of embryonic development in Drosophila melanogaster
Source: PubMed Central journal article supplement (PMC5054588; doi:10.1186/s12862-016-0776-z), 2016-10-07
Supplement: 12862_2016_776_MOESM3_ESM.pdf [file 12862_2016_776_MOESM3_ESM.pdf]

**Table S2:** Results of ANOVA on DT (A) and viability (B). Prior to variance decomposition, a Box-Cox transformation was applied to the DT data (lambda values are shown), and an arcsine square root transform was applied to EAV ratios.  $\sigma^2$  (%) estimates are based on Mean Sums of Squares. df.: degree of freedom;  $\sigma^2$ : variance component. \*p < 0.05; \*\*p < 0.01; \*\*\*p < 0.001.

| Source                                  | Df | Sum Sq   | Mean Sq   | F value | P            | $\sigma^2$ (%) |
|-----------------------------------------|----|----------|-----------|---------|--------------|----------------|
| <b>A – Development time (DT)</b>        |    |          |           |         |              |                |
| <b>A.1 – LD – lambda = -4.312378</b>    |    |          |           |         |              |                |
| RAL                                     | 1  | 4.75E-12 | 4.75E-12  | 4.300   | 0.0443*      | 56.83          |
| Embryo age                              | 2  | 4.71E-12 | 2.36E-12  | 2.132   | 0.1312       | 28.18          |
| RAL – Embryo age                        | 2  | 3.00E-13 | 1.49E-13  | 0.135   | 0.8744       | 1.78           |
| Residuals                               | 42 | 4.64E-11 | 1.105E-12 |         |              | 13.21          |
| <b>A.2 – HD – lambda = -3.748706</b>    |    |          |           |         |              |                |
| RAL                                     | 1  | 5.85E-10 | 5.85E-10  | 38.737  | 1.89E-07***  | 83.08          |
| Embryo age                              | 2  | 1.90E-10 | 9.49E-11  | 6.287   | 0.00409**    | 13.49          |
| RAL – Embryo age                        | 2  | 1.80E-11 | 9.00E-12  | 0.597   | 0.55494      | 1.28           |
| Residuals                               | 42 | 6.34E-10 | 1.51E-11  |         |              | 2.15           |
| <b>A.3 – "0h" – lambda = -4.206</b>     |    |          |           |         |              |                |
| RAL                                     | 1  | 4.00E-12 | 4.00E-12  | 1.841   | 0.1818       | 0.68           |
| Density                                 | 1  | 5.67E-10 | 5.67E-10  | 258.016 | 5.077E-20*** | 95.64          |
| RAL:Density                             | 1  | 1.96E-11 | 1.96E-11  | 8.947   | 0.00454**    | 3.31           |
| Residuals                               | 44 | 9.66E-11 | 2.20E-12  |         |              | 0.37           |
| <b>A.4 – "4h" – lambda = -3.968312</b>  |    |          |           |         |              |                |
| RAL                                     | 1  | 1.01E-11 | 1.01E-11  | 3.128   | 0.09222.     | 0.67           |
| Density                                 | 1  | 1.46E-09 | 1.46E-09  | 453.635 | 3.24E-15***  | 96.69          |
| RAL:Density                             | 1  | 3.68E-11 | 3.68E-11  | 11.406  | 0.0029**     | 2.43           |
| Residuals                               | 20 | 6.45E-11 | 3.20E-12  |         |              | 0.21           |
| <b>A.5 – "7h" – lambda = -2.453138</b>  |    |          |           |         |              |                |
| RAL                                     | 1  | 5.95E-08 | 5.95E-08  | 12.720  | 0.0019**     | 2.10           |
| Density                                 | 1  | 2.60E-06 | 2.60E-06  | 555.390 | 4.61E-16***  | 91.68          |
| RAL:Density                             | 1  | 1.72E-07 | 1.72E-07  | 36.660  | 6.43E-06***  | 6.05           |
| Residuals                               | 20 | 9.36E-08 | 4.70E-09  |         |              | 0.17           |
| <b>B – Egg-to-adult viability (EAV)</b> |    |          |           |         |              |                |
| <b>B.1 – LD</b>                         |    |          |           |         |              |                |
| RAL                                     | 1  | 0.094    | 0.094     | 11.785  | 0.00297**    | 91.55          |
| Age_of_egg                              | 2  | 0.00053  | 0.00027   | 0.033   | 0.96741      | 0.26           |
| RAL:Age_of_egg                          | 2  | 0.00087  | 0.00044   | 0.055   | 0.94703      | 0.43           |
| Residuals                               | 18 | 0.14427  | 0.00801   |         |              | 7.76           |
| <b>B.2 – HD</b>                         |    |          |           |         |              |                |
| RAL                                     | 1  | 0.2485   | 0.24852   | 32.073  | 2.26E-05***  | 90.84          |
| Age_of_egg                              | 2  | 0.0253   | 0.01265   | 1.633   | 0.223        | 4.62           |
| RAL:Age_of_egg                          | 2  | 0.0093   | 0.00465   | 0.600   | 0.56         | 1.70           |
| Residuals                               | 18 | 0.1395   | 0.00775   |         |              | 2.83           |

**B.3 - "0h"**

|             |    |         |         |        |                  |       |
|-------------|----|---------|---------|--------|------------------|-------|
| RAL         | 1  | 0.13923 | 0.13923 | 11.116 | <i>0.00331**</i> | 56.29 |
| Density     | 1  | 0.09378 | 0.09378 | 7.488  | <i>0.01272*</i>  | 37.91 |
| RAL:Density | 1  | 0.00183 | 0.00183 | 0.146  | 0.70615          | 0.74  |
| Residuals   | 20 | 0.25049 | 0.01252 |        |                  | 5.06  |

**B.4 - "4h"**

|             |   |         |         |        |                    |       |
|-------------|---|---------|---------|--------|--------------------|-------|
| RAL         | 1 | 0.11571 | 0.11571 | 89.290 | <i>1.29E-05***</i> | 80.03 |
| Density     | 1 | 0.01306 | 0.01306 | 10.080 | <i>0.0131*</i>     | 9.03  |
| RAL:Density | 1 | 0.01452 | 0.01452 | 11.2   | <i>0.0101*</i>     | 10.04 |
| Residuals   | 8 | 0.01037 | 0.0013  |        |                    | 0.90  |

**B.5 - "7h"**

|             |   |         |         |        |                    |       |
|-------------|---|---------|---------|--------|--------------------|-------|
| RAL         | 1 | 0.07387 | 0.07387 | 25.829 | <i>0.000951***</i> | 73.80 |
| Density     | 1 | 0.01538 | 0.01538 | 5.379  | <i>0.048969*</i>   | 15.37 |
| RAL:Density | 1 | 0.00798 | 0.00798 | 2.791  | 0.133367           | 7.97  |
| Residuals   | 8 | 0.02288 | 0.00286 |        |                    | 2.86  |
