# Supplementary material for: A novel method for quantifying the rate of embryogenesis uncovers considerable genetic variation for the duration of embryonic development in Drosophila melanogaster
Source: PubMed Central journal article supplement (PMC5054588; doi:10.1186/s12862-016-0776-z), 2016-10-07

**Figure S5.** Results of the power calculations to detect associated SNPs with effect size of 1 hour of difference in the length of embryogenesis (at the level of  $p = 10^{-5}$ ). Cohen's  $d=2.335$ ,  $\sigma_p=0.413$ ,  $\mu_1=0.89$ ,  $\sigma^2_1=0.138$ ,  $\mu_2=-0.086$ ,  $\sigma^2_2=0.18$ . Red vertical line shows the DGRP sample size (43).

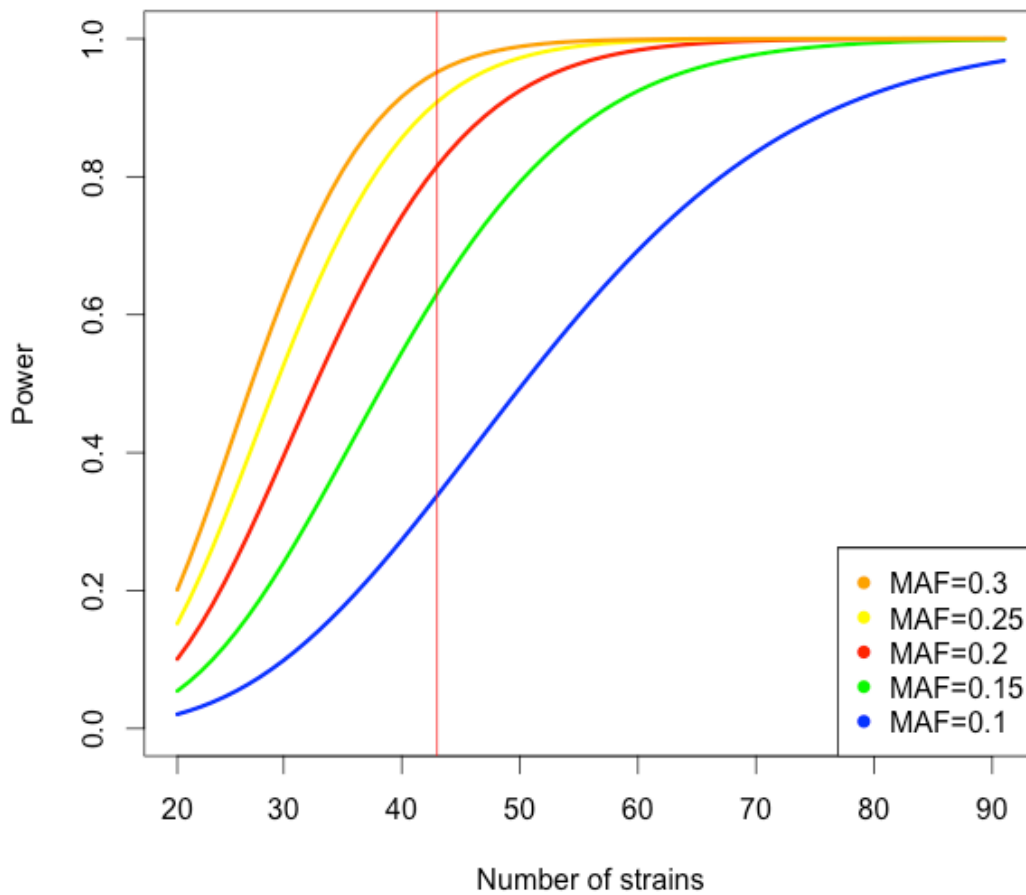

Supplement: 12862_2016_776_MOESM6_ESM.pdf [file 12862_2016_776_MOESM6_ESM.pdf]
