# Supplementary material for: A novel method for quantifying the rate of embryogenesis uncovers considerable genetic variation for the duration of embryonic development in Drosophila melanogaster
Source: PubMed Central journal article supplement (PMC5054588; doi:10.1186/s12862-016-0776-z), 2016-10-07
Supplement: 12862_2016_776_MOESM7_ESM.pdf [file 12862_2016_776_MOESM7_ESM.pdf]

**Table S3.** Top GWAS results for embryogenesis length and the corresponding DGRP phenotypes. Colours indicate SNPs which affect the same genes and/or lay in the same genomic region in close proximity of each other.

| Position | Minor allele | Major allele | Ref. allele | Mixed model p-val | Flybase ID                  | Gene ID   | Genomic annotation    | Function                                                                                                         | Max expression | Embryonic expression |
|----------|--------------|--------------|-------------|-------------------|-----------------------------|-----------|-----------------------|------------------------------------------------------------------------------------------------------------------|----------------|----------------------|
| 2989334  | A            | G            | G           | 1.26E-07          | NA                          | NA        |                       |                                                                                                                  |                |                      |
| 2990007  | C            | G            | G           | 1.26E-07          | NA                          | NA        |                       |                                                                                                                  |                |                      |
| 2990383  | A            | C            | C           | 1.26E-07          | NA                          | NA        |                       |                                                                                                                  |                |                      |
| 2990421  | G            | A            | A           | 4.55E-07          | NA                          | NA        |                       |                                                                                                                  |                |                      |
| 2990517  | C            | T            | T           | 1.03E-06          | NA                          | NA        |                       |                                                                                                                  |                |                      |
| 5647785  | A            | T            | T           | 1.06E-06          | <a href="#">FBgn0051646</a> | DIP-theta | INTRON                | unknown                                                                                                          | Embryo 22-24 h | late                 |
| 1746616  | GTTCG        | G            | GTTCG       | 1.17E-06          | <a href="#">FBgn0085414</a> | dpr12     | UTR_3_PRIME           | sensory perception                                                                                               | Embryo 22-24 h | late                 |
| 8419426  | T            | A            | T           | 1.49E-06          | <a href="#">FBgn0038063</a> | Octbeta2R | INTRON                | Receptor and TF activity                                                                                         | Pupae 4d       | late                 |
| 2989987  | C            | T            | T           | 1.74E-06          | NA                          | NA        |                       |                                                                                                                  |                |                      |
| 5916148  | G            | C            | C           | 1.93E-06          | <a href="#">FBgn0052407</a> | CG32407   | SYNONYMOUS_CODING     | unknown                                                                                                          | Embryo 12-14 h | intermed             |
| 13982689 | A            | C            | A           | 2.20E-06          | <a href="#">FBgn0036391</a> | CG17364   | INTRON                | unknown                                                                                                          | Male 30 d      | late                 |
|          |              |              |             |                   | <a href="#">FBgn0036394</a> | CG9040    | DOWNSTREAM            | unknown                                                                                                          | Larva L3       | late                 |
| 13982684 | T            | G            | T           | 2.51E-06          | FBgn0036391                 | CG17364   | INTRON                | unknown                                                                                                          | Male 30 d      | late                 |
| 4953245  | G            | A            | A           | 2.67E-06          | <a href="#">FBgn0031654</a> | Jon25Bii  | UPSTREAM              | neurogenesis; proteolysis                                                                                        | Larva L3       | late                 |
| 13000981 | T            | C            | T           | 2.69E-06          | <a href="#">FBgn0038492</a> | Mur89F    | INTRON                | chitin metabolic process                                                                                         | Larva L2       | -                    |
| 11276472 | T            | A            | A           | 2.78E-06          | <a href="#">FBgn0040233</a> | cana      | NON_SYNONYMOUS_CODING | metaphase/anaphase transition of mitotic cell cycle; microtubule-based movement                                  | Embryo 0-2 h   | early                |
| 13982667 | G            | A            | G           | 2.88E-06          | FBgn0036391                 | CG17364   | INTRON                | unknown                                                                                                          | Male 30 d      | late                 |
| 13982671 | A            | AT           | A           | 2.88E-06          | FBgn0036391                 | CG17364   | INTRON                | unknown                                                                                                          | -  -           | -  -                 |
|          |              |              |             |                   | FBgn0036394                 | CG9040    | DOWNSTREAM            | unknown                                                                                                          | Larva L3       | late                 |
| 13982673 | C            | T            | C           | 2.88E-06          | FBgn0036391                 | CG17364   | INTRON                | unknown                                                                                                          | Male 30 d      | late                 |
|          |              |              |             |                   | FBgn0036394                 | CG9040    | DOWNSTREAM            | unknown                                                                                                          | Larva L3       | late                 |
| 7339060  | G            | A            | G           | 3.86E-06          | <a href="#">FBgn0031902</a> | Wnt6      | INTRON                | regulation of transcription; Wnt signaling pathway; axis specification; anterior/posterior pattern specification | Embryo 6-10 h  | intermed             |
| 7339108  | C            | A            | C           | 3.86E-06          | FBgn0031902                 | Wnt6      | INTRON                | -  -                                                                                                             | -  -           | -  -                 |
| 7339117  | C            | T            | C           | 3.86E-06          | FBgn0031902                 | Wnt6      | INTRON                | -  -                                                                                                             | -  -           | -  -                 |
| 7339135  | T            | C            | T           | 3.86E-06          | FBgn0031902                 | Wnt6      | INTRON                | -  -                                                                                                             | -  -           | -  -                 |
| 7238785  | A            | C            | C           | 4.33E-06          | <a href="#">FBgn0037894</a> | Ranbp9    | SYNONYMOUS_CODING     | intracellular protein transport                                                                                  | Embryo 0-4 h   | early                |
|          |              |              |             |                   | <a href="#">FBgn0011774</a> | Irbp      | DOWNSTREAM            | double-strand break repair via nonhomologous end joining; telomere maintenance                                   | Embryo 0-2 h   | early                |
| 16100634 | C            | A            | C           | 4.36E-06          |                             | NA        | NA                    |                                                                                                                  |                |                      |
| 7238756  | A            | G            | G           | 4.55E-06          | FBgn0037894                 | Ranbp9    | NON_SYNONYMOUS_CODING | intracellular protein transport                                                                                  | Embryo 0-4 h   | Embryo 0-4 h         |
|          |              |              |             |                   | FBgn0011774                 | Irbp      | DOWNSTREAM            | double-strand break repair via nonhomologous end joining; telomere maintenance                                   | Embryo 0-2 h   | early                |
| 13982692 | T            | C            | T           | 5.00E-06          | FBgn0036391                 | CG17364   | INTRON                | unknown                                                                                                          | Male 30 d      | late                 |
|          |              |              |             |                   | FBgn0036394                 | CG9040    | DOWNSTREAM            | unknown                                                                                                          | Larva L3       | late                 |
| 4284668  | G            | A            | G           | 5.10E-06          | <a href="#">FBgn0035526</a> | CG1316    | SYNONYMO              | unknown                                                                                                          | Embryo 4-6 h   | early                |

|          |   |   |   |          |                             |         | US_CODING          |                                                                                                                                                                                            |                |                         |
|----------|---|---|---|----------|-----------------------------|---------|--------------------|--------------------------------------------------------------------------------------------------------------------------------------------------------------------------------------------|----------------|-------------------------|
| 1808297  | T | G | T | 5.69E-06 | <a href="#">FBgn0263109</a> | CG43366 | UTR_5_PRIM E       | unknown                                                                                                                                                                                    | Embryo 12-14 h | intermed                |
| 14724027 | A | G | G | 5.80E-06 | <a href="#">FBgn0259175</a> | ome     | INTRON             | proteolysis                                                                                                                                                                                | Embryo 16-18 h | intermed                |
| 14724028 | A | G | G | 5.80E-06 | FBgn0259175                 | ome     | INTRON             | -  -                                                                                                                                                                                       | -  -           | -  -                    |
| 2990408  | C | T | T | 5.96E-06 |                             | NA      | NA                 |                                                                                                                                                                                            |                |                         |
| 12169384 | C | G | G | 6.46E-06 | <a href="#">FBgn0038418</a> | pad     | SYNONYMO US_CODING | chaeta morphogenesis; negative regulation of transcription                                                                                                                                 | Embryo 0-2 h   | early                   |
| 2990411  | T | C | C | 6.70E-06 |                             | NA      | NA                 |                                                                                                                                                                                            |                |                         |
| 11917168 | A | G | A | 7.94E-06 | <a href="#">FBgn0036222</a> | SdhAL   | SYNONYMO US_CODING | respiratory electron transport; tricarboxylic acid cycle                                                                                                                                   | Male 30 d      | -                       |
| 18166079 | A | C | C | 8.14E-06 | <a href="#">FBgn0003997</a> | W       | INTRON             | embryonic development; eye morphogenesis; neurogenesis; imaginal disc-derived appendage morphogenesis                                                                                      | Prepupae 24 h  | intermed                |
| 14661465 | G | A | G | 8.19E-06 | <a href="#">FBgn0041604</a> | dlp     | INTRON             | positive regulation of Wnt signaling pathway; regulation of growth; neurological system process; post-embryonic organ morphogenesis; sensory organ development                             | Embryo 6-8 h   | intermed                |
| 14661508 | A | T | A | 8.19E-06 | FBgn0041604                 | dlp     | INTRON             | -  -                                                                                                                                                                                       | -  -           | -  -                    |
| 13982681 | T | G | T | 8.41E-06 | FBgn0036391                 | CG17364 | INTRON             | unknown                                                                                                                                                                                    | Male 30 d      | late                    |
|          |   |   |   |          | FBgn0036394                 | CG9040  | DOWNSTRE AM        | unknown                                                                                                                                                                                    | Larva L3       | late                    |
| 17478881 | A | C | C | 9.09E-06 | <a href="#">FBgn0036731</a> | CG6333  | INTRON             | unknown                                                                                                                                                                                    | Male 30 d      | -                       |
| 2140972  | C | A | A | 9.22E-06 | <a href="#">FBgn0031390</a> | tho2    | SYNONYMO US_CODING | oogenesis; mRNA export from nucleus transcription from RNA polymerase I promoter; terminal branching; lumen formation, open tracheal system biogenesis; cell adhesion; embryo development; | Embryo 2-4 h   | early                   |
| 9055188  | G | A | A | 9.23E-06 | <a href="#">FBgn0030096</a> | Zpr1    | SYNONYMO US_CODING | regulation of nervous system development; regulation of cell shape                                                                                                                         | Larva L1       | early + intermed + late |
| 19604018 | T | C | C | 9.35E-06 | <a href="#">FBgn0000464</a> | Lar     | INTRON             | unknown                                                                                                                                                                                    | Prepupae 24 h  | early + late            |
| 3184408  | T | G | G | 9.80E-06 | <a href="#">FBgn0085422</a> | CG34393 | INTRON             | unknown                                                                                                                                                                                    | Embryo 18-24 h | late                    |
| 12295627 | C | A | A | 9.93E-06 | <a href="#">FBgn0264273</a> | Sema-2b | INTRON             | olfactory bulb axon guidance; dendrite guidance                                                                                                                                            | Prepupae 24 h  | intermed                |
| 11917123 | G | A | A | 9.98E-06 | FBgn0036222                 | CG5718  | SYNONYMO US_CODING | unknown                                                                                                                                                                                    | Male 30 d      | -                       |
| 18109582 | C | G | G | 1.98E-05 | <a href="#">FBgn0036777</a> | CG7341  | INTRON             | unknown                                                                                                                                                                                    | Embryo 4-6 h   | early                   |
|          |   |   |   |          | <a href="#">FBgn0052195</a> | CG32195 | DOWNSTRE AM        | unknown                                                                                                                                                                                    | Larva L3       | early + intermed + late |
