# Supplementary material for: A novel method for quantifying the rate of embryogenesis uncovers considerable genetic variation for the duration of embryonic development in Drosophila melanogaster
Source: PubMed Central journal article supplement (PMC5054588; doi:10.1186/s12862-016-0776-z), 2016-10-07

**Figure S3.** The effects of *Wolbachia pipientis* infection on the measured phenotype.

(A) Relative mean DT measured for 43 DGRP lines. Black colour indicates no *Wolbachia* infection (22 lines), while blue colour is assigned for infected strains (21 lines). (B) Relative mean DT for the two *Wolbachia* groups. Black and blue are mean phenotypes among non-infected and infected lines, respectively. There is no effect of *Wolbachia* infection on the length of embryogenesis.

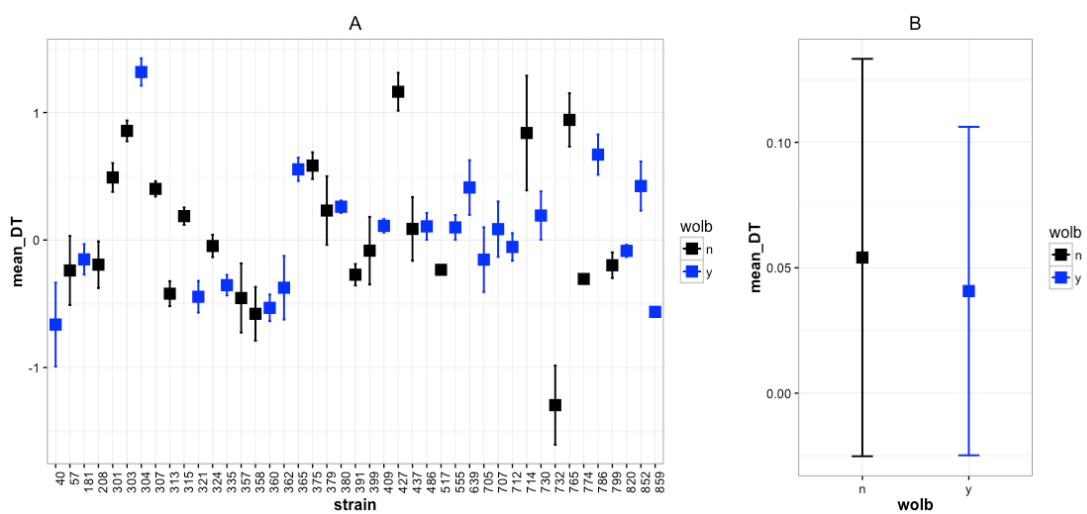

Supplement: 12862_2016_776_MOESM8_ESM.pdf [file 12862_2016_776_MOESM8_ESM.pdf]
